# Supplementary material for: Molecular epidemiology of clinical Mycobacterium tuberculosis complex isolates in South Omo, Southern Ethiopia
Source: Springer Nature journal article supplement (doi:10.1186/s12879-020-05394-9), 2020-10-13
Supplement: MOESM1 [file 18479306]

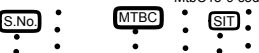

24 MIRU-VNTR loci repeat numbers

Spoligos in webdings format

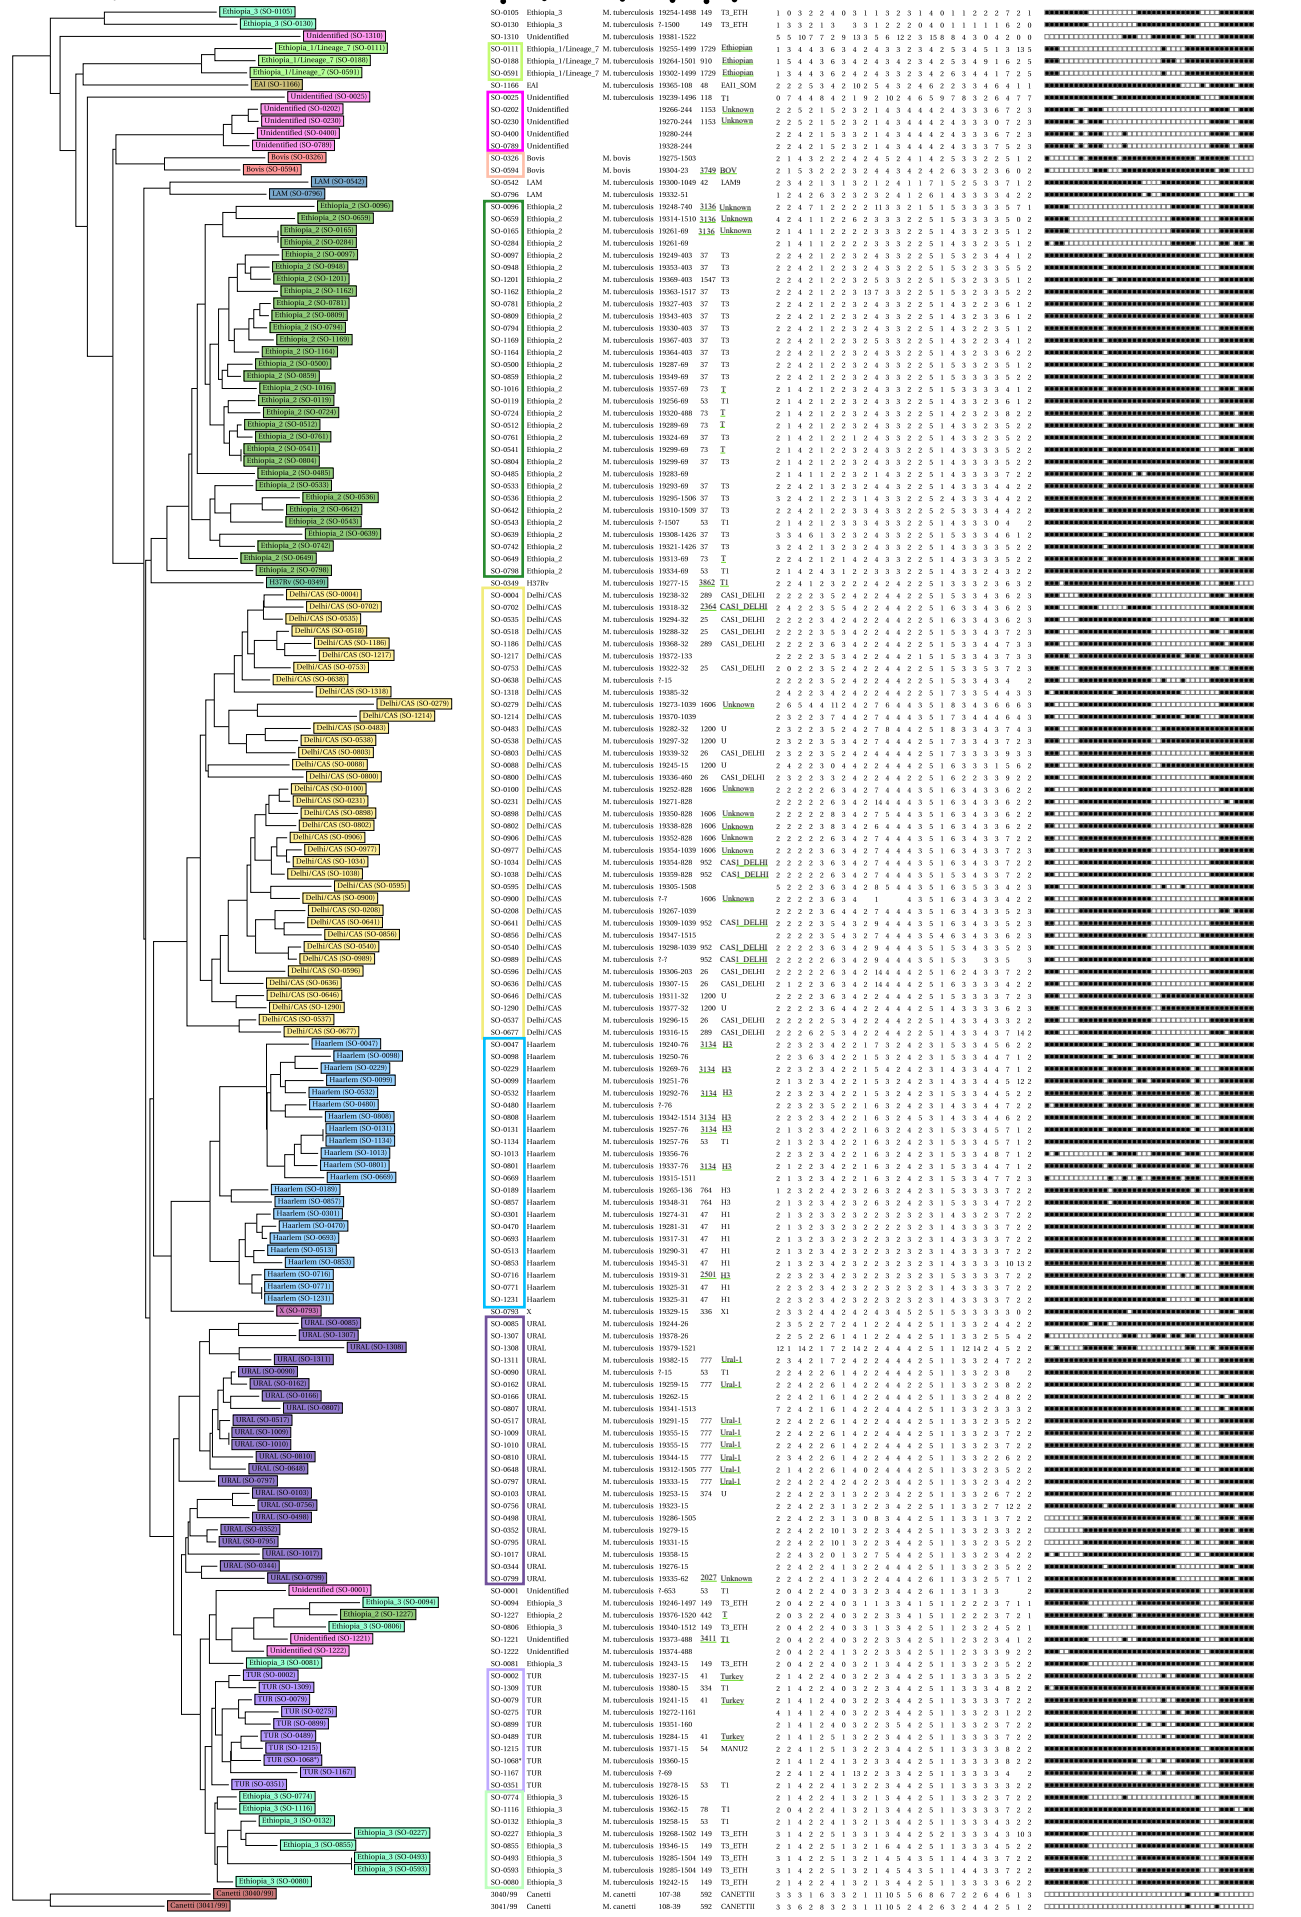

Lineage: Bovis, Canetti, Delhi/CAS, HA, Ethiopia\_1/Lineage\_7, Ethiopia\_2, Ethiopia\_3, H3PB, Haasem, IAM, TUR, Unidentified, X

S1- Phylogenetic tree for 155 isolates was constructed based on 24 locus MIRU-VNTR. The dendrogram was calculated using neighbor-joining clustering algorithms.
